# Supplementary material for: The incidence and health burden of earaches attributable to recreational swimming in natural waters: a prospective cohort study
Source: PubMed Central journal article supplement (PMC3765573; doi:10.1186/1476-069x-12-67), 2013-08-21
Supplement: 1476-069X-12-67-S1.pdf [file 1476-069X-12-67-S1.pdf]

## Supplemental Information

Table S1: Adjusted odds ratios for earache for selected age groups. Estimates from a logistic regression model with a random intercept for beach.

|                                      | 5 years and under |           | Over 1 year |           | Over 5 years |           |
|--------------------------------------|-------------------|-----------|-------------|-----------|--------------|-----------|
|                                      | AOR               | 95% CI    | AOR         | 95% CI    | AOR          | 95% CI    |
| Head immersion swimming              | 1.52              | 0.80,2.88 | 1.69****    | 1.36,2.11 | 1.80****     | 1.43,2.27 |
| <i>Age (ref. 20-50)</i> <sup>1</sup> |                   |           |             |           |              |           |
| Age 0-1                              | 1.53              | 0.88,2.66 |             |           |              |           |
| Age 2-5                              | 1.00              | 1.00,1.00 | 1.13        | 0.84,1.54 |              |           |
| Age 6-10                             |                   |           | 1.27*       | 1.01,1.62 | 1.31*        | 1.03,1.67 |
| Age 11-19                            |                   |           | 0.88        | 0.70,1.11 | 0.87         | 0.69,1.10 |
| Over 60                              |                   |           | 0.76+       | 0.57,1.01 | 0.76+        | 0.57,1.03 |
| Non-white race                       |                   |           | 1.24        | 0.94,1.64 | 1.23         | 0.93,1.64 |
| Female                               |                   |           | 1.33***     | 1.13,1.56 | 1.35***      | 1.14,1.61 |
| Unfamiliar animal contact            |                   |           | 1.61***     | 1.26,2.05 | 1.58***      | 1.21,2.05 |
| Other swimming <sup>2</sup>          |                   |           | 1.59****    | 1.35,1.88 | 1.56****     | 1.30,1.86 |
| Used insect repellent                |                   |           | 1.42**      | 1.10,1.83 | 1.53**       | 1.16,2.01 |
| Allergies                            |                   |           | 1.62****    | 1.34,1.97 | 1.69****     | 1.38,2.07 |
| Asthma                               |                   |           | 1.48**      | 1.15,1.90 | 1.43*        | 1.08,1.88 |
| Miles travelled <sup>3</sup>         |                   |           |             |           | 0.92+        | 0.84,1.01 |
| Rain (inches) <sup>4</sup>           |                   |           |             |           | 1.22         | 0.95,1.56 |

+ p<0.1, \* p<0.05, \*\* p<0.01, \*\*\* p<0.001, \*\*\*\* p<0.0001

AOR=Adjusted Odds Ratio, 95% CI=95% Confidence Interval

1: For Under Age 5 model reference group is Age 2-5

2: Other head immersion swimming in the 1-week prior to the beach visit

3: Miles travelled to the beach (0-20; 21-60; 61-100; > 100 miles)

4: Inches of precipitation in previous 17 hours
